# Supplementary material for: A Randomized Trial to Assess the Efficacy and Safety of ABT-126, a Selective α7 Nicotinic Acetylcholine Receptor Agonist, in the Treatment of Cognitive Impairment in Schizophrenia
Source: Atypon-hosted journal article supplement (doi:10.1176/appi.ajp.2015.15010093), 2016-03-04
Supplement: appi.ajp.2015.15010093.ds001.pdf [file appi.ajp.2015.15010093.ds001.pdf]

**TABLE S1. Timing of Safety, Psychiatric, and Cognitive Assessments**

|                          | Screening Visit 1 | Screening Visit 2 | Day -1 | Day 7 | Day 14 | Day 28 | Day 42 | Day 56 | Day 84 | Follow-Up (Day 98) |
|--------------------------|-------------------|-------------------|--------|-------|--------|--------|--------|--------|--------|--------------------|
| Adverse Event Monitoring |                   | X                 | X      | X     | X      | X      | X      | X      | X      | X                  |
| MCCB                     | X                 |                   | X      |       |        |        | X      |        | X      |                    |
| UPSA-2                   |                   |                   | X      |       |        |        |        |        | X      |                    |
| CANTAB                   | X                 | X                 |        |       |        | X      |        | X      |        |                    |
| PANSS                    | X                 | X                 | X      |       |        | X      | X      |        | X      |                    |
| NSA-16                   |                   |                   | X      |       | X      |        | X      |        | X      |                    |
| CGI-S                    |                   |                   | X      |       | X      |        | X      |        | X      |                    |
| CDSS                     | X                 |                   |        |       |        |        |        |        |        |                    |

MCCB = MATRICS Consensus Cognitive Battery, UPSA-2 = University of California Performance-Based Skills Assessment-2, CANTAB = Cambridge Neuropsychological Test Automated Battery (CANTAB), PANSS = Positive and Negative Syndrome Scale, NSA-16 = 16-item Negative Symptom Assessment, CGI-S = Clinical Global Impression-Severity, CDSS = Calgary Depression Scale for Schizophrenia.

**TABLE S2. Summary of Adverse Events**

|                                                                                              | Placebo<br>N=67 |    | ABT-126        |                 |               |    |                   |    |
|----------------------------------------------------------------------------------------------|-----------------|----|----------------|-----------------|---------------|----|-------------------|----|
|                                                                                              |                 |    | 10 mg<br>N=69  |                 | 25 mg<br>N=67 |    | Any dose<br>N=136 |    |
|                                                                                              | N               | %  | N              | %               | N             | %  | N                 | %  |
| <b>Summary</b>                                                                               |                 |    |                |                 |               |    |                   |    |
| Any adverse event                                                                            | 38              | 57 | 35             | 51              | 39            | 58 | 74                | 54 |
| Severe adverse event                                                                         | 4               | 6  | 3              | 4               | 4             | 6  | 7                 | 5  |
| Serious adverse event                                                                        | 3               | 5  | 1              | 1               | 5             | 8  | 6                 | 4  |
| Deaths                                                                                       | 0               | 0  | 0              | 0               | 0             | 0  | 0                 | 0  |
| Discontinued due to adverse event                                                            | 5               | 8  | 4              | 6               | 8             | 6  | 13                | 6  |
| <b>Any adverse events reported by <math>\geq 3\%</math> of subjects treated with ABT-126</b> |                 |    |                |                 |               |    |                   |    |
| Diarrhea                                                                                     | 2               | 3  | 5              | 7               | 5             | 8  | 10                | 7  |
| Dizziness                                                                                    | 1               | 2  | 7 <sup>a</sup> | 10 <sup>a</sup> | 3             | 5  | 10                | 7  |
| Headache                                                                                     | 6               | 9  | 3              | 4               | 7             | 10 | 10                | 7  |
| Nausea                                                                                       | 5               | 8  | 5              | 7               | 3             | 5  | 8                 | 6  |
| Fatigue                                                                                      | 1               | 2  | 4              | 6               | 3             | 5  | 7                 | 5  |
| Nasopharyngitis                                                                              | 2               | 3  | 3              | 4               | 4             | 6  | 7                 | 5  |
| Insomnia                                                                                     | 3               | 5  | 0              | 0               | 5             | 8  | 5                 | 4  |
| Blood creatine phosphokinase increased                                                       | 0               | 0  | 2              | 3               | 3             | 5  | 5                 | 4  |
| Upper respiratory tract infection                                                            | 3               | 5  | 3              | 4               | 2             | 3  | 5                 | 4  |

<sup>a</sup> Two-sided p value compared to placebo, 0.063.
